# Supplementary material
Source: publisher figshare collection journal article supplement (https://tandf.figshare.com/ndownloader/files/17992562)
Supplement: Supplementary file 1 [file 17992562]

## SUPPLEMENTARY APPENDIX

This appendix has been provided by the authors to give readers additional information about their work.

Supplement to:

**Yeast strains from coconut toddy in Sri Lanka show high tolerance to inhibitors derived from the hydrolysis of lignocellulosic materials**

Ahangangoda Arachchige Maduka Subodinee, Osamu Mizutani and Hirohide Toyama

Biotechnol. Biotechnol. Equip. 2019, **33**

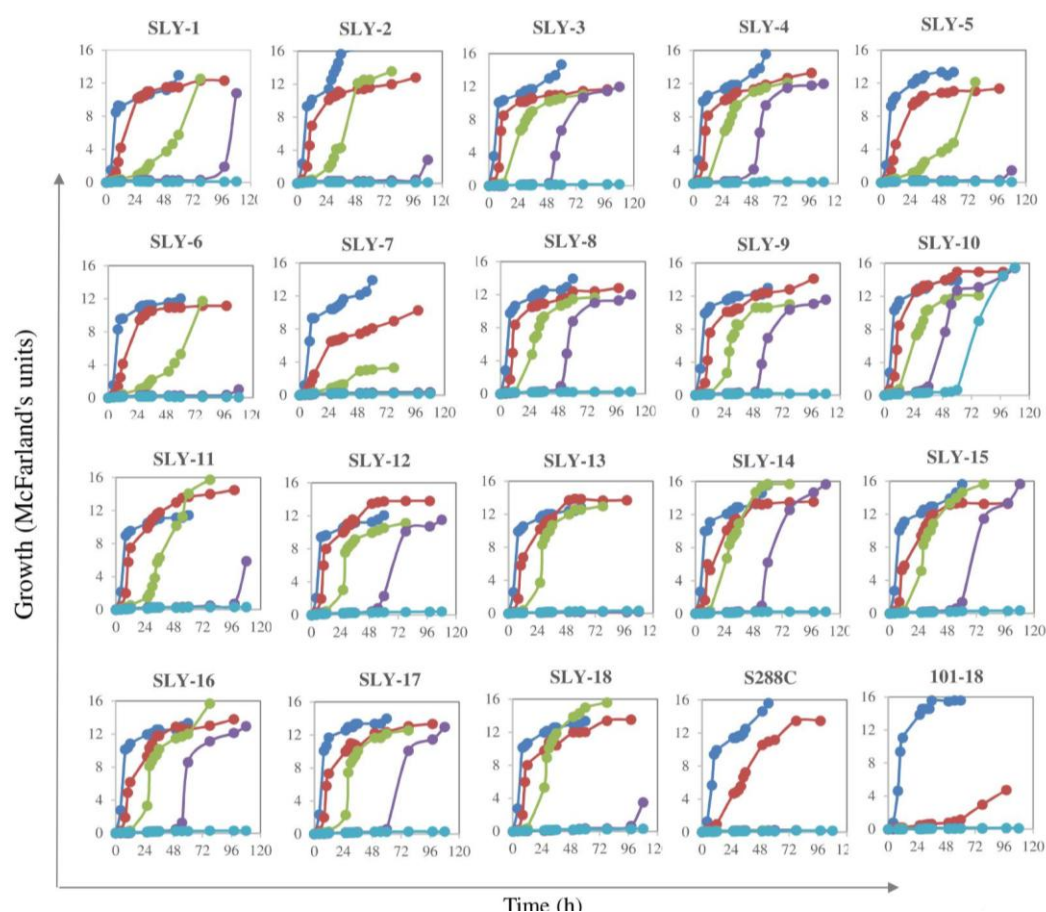

**Figure S1** Growth of all *Saccharomyces cerevisiae* isolated strains (SLY-1–18) in the presence of vanillin; 0 mmol L<sup>-1</sup> (blue), 6 mmol L<sup>-1</sup> (red), 12 mmol L<sup>-1</sup> (green), 18 mmol L<sup>-1</sup> (purple) and 21 mmol L<sup>-1</sup> (sky-blue). Note: Each experiment was carried out in 5 mL of YPD medium supplemented with different concentrations of vanillin, and all yeast cultures were incubated at 30 °C with shaking at 200 rpm. Comparison of the growth of each yeast strain was shown with two reference strains; laboratory yeast S288C and Awamori yeast 101-18 strains.
